## Hydrogen sulfide as an oxygen sensor/transducer in vertebrate hypoxic vasoconstriction and hypoxic vasodilation

Kenneth R. Olson<sup>1,\*</sup>, Ryan A. Dombkowski<sup>1,2,†</sup>, Michael J. Russell<sup>1,‡</sup>, Meredith M. Doellman<sup>2</sup>, Sally K. Head<sup>2</sup>, Nathan L. Whitfield<sup>1,2</sup> and Jane A. Madden<sup>3,4</sup>

<sup>1</sup>Indiana University School of Medicine-South Bend, 1234 Notre Dame Avenue, South Bend, IN 46617, USA,

<sup>2</sup>Department of Biological Sciences, University of Notre Dame, Notre Dame, IN 46556, USA, <sup>3</sup>Department of Neurology, The Medical College of Wisconsin, Milwaukee 53226, WI, USA and <sup>4</sup>Research Service, Zablocki Veterans Affairs Medical Center, Milwaukee, WI 53295, USA

\*Author for correspondence (e-mail: kolson@nd.edu)

†Present address: Dept of Biology, Saint Mary's College, Notre Dame, IN 46556, USA

‡Present address: Dept of Basic Medical Sciences, Mercer School of Medicine, 1550 College St Macon, GA 31207, USA

Accepted 1 August 2006

### Summary

How vertebrate blood vessels sense acute hypoxia and respond either by constricting (hypoxic vasoconstriction) or dilating (hypoxic vasodilation) has not been resolved. In the present study we compared the mechanical and electrical responses of select blood vessels to hypoxia and H<sub>2</sub>S, measured vascular H<sub>2</sub>S production, and evaluated the effects of inhibitors of H<sub>2</sub>S synthesis and addition of the H<sub>2</sub>S precursor, cysteine, on hypoxic vasoconstriction and hypoxic vasodilation. We found that: (1) in all vertebrate vessels examined to date, hypoxia and H<sub>2</sub>S produce temporally and quantitatively identical responses even though the responses vary from constriction (lamprey dorsal aorta; IDA), to dilation (rat aorta; rA), to multi-phasic (rat and bovine pulmonary arteries; rPA and bPA, respectively). (2) The responses of IDA, rA and bPA to hypoxia and H<sub>2</sub>S appear competitive; in the presence of one stimulus, the response to the other stimulus is

substantially or completely eliminated. (3) Hypoxia and H<sub>2</sub>S produce the same degree of cell depolarization in bPA. (4) H<sub>2</sub>S is constitutively synthesized by IDA and bPA vascular smooth muscle. (5) Inhibition of H<sub>2</sub>S synthesis inhibits the hypoxic response of IDA, rA, rPA and bPA. (6) Addition of the H<sub>2</sub>S precursor, cysteine, doubles hypoxic contraction in IDA, prolongs contraction in bPA and alters the re-oxygenation response of rA. These studies suggest that H<sub>2</sub>S may serve as an O<sub>2</sub> sensor/transducer in the vascular responses to hypoxia. In this model, the concentration of vasoactive H<sub>2</sub>S in the vessel is governed by the balance between endogenous H<sub>2</sub>S production and its oxidation by available O<sub>2</sub>.

Key words: vascular smooth muscle, hydrogen sulfide metabolism, cysteine metabolism, redox signaling.

### Introduction

Hydrogen sulfide (H<sub>2</sub>S) has long been known as a noxious and toxic gas. However, recent studies have shown that vertebrate tissues synthesize H<sub>2</sub>S and this endogenous gas is, in fact, a signaling molecule, thereby joining NO and CO as the third 'gasotransmitter' (Wang, 2002). H<sub>2</sub>S has been shown to be a neuromodulator and neuroprotectant (Kimura et al., 2005), to exert effects in intestinal (Teague et al., 2002) and genito-urinary (Sidhu et al., 2001; Patacchini et al., 2005; Dombkowski, 2006) systems, and to have potent cardiovascular actions.

Until now, studies of the vasoactive effects of H<sub>2</sub>S have been limited to systemic vessels. H<sub>2</sub>S has been shown to be a vasodilator in mammalian vessels such as the rat thoracic aorta

and portal vein (Hosoki et al., 1997; Zhao et al., 2001; Zhao and Wang, 2002; Zhang et al., 2003) and the perfused mesenteric bed (Cheng et al., 2004). In non-mammalian vertebrates H<sub>2</sub>S may produce vasodilation, vasoconstriction or it may produce multi-phasic responses (Dombkowski et al., 2004; Dombkowski et al., 2005; Olson, 2005).

Information on the involvement of H<sub>2</sub>S in the pulmonary vasculature is limited and indirect. H<sub>2</sub>S toxicity is often associated with pulmonary edema (Roth, 2004), suggesting that either capillary permeability or pulmonary blood pressure is increased. In chronically hypoxic rats one of the enzymes responsible for H<sub>2</sub>S synthesis is reduced in systemic vessels (Zhang et al., 2003). Plasma [H<sub>2</sub>S] is also lower in these animals, suggesting that overall H<sub>2</sub>S production is reduced. These data led the authors to infer that a hypoxia-induced loss

in tonic H<sub>2</sub>S dilation contributed to chronic hypoxic pulmonary vasoconstriction, although they did not study the effects of H<sub>2</sub>S on pulmonary vessels.

During the course of independent studies on the phylogeny of vascular responses to hypoxia (Smith et al., 2001; Olson et al., 2001; Russell et al., 2001) (M.J.R., R.A.D. and K.R.O., unpublished observation) and H<sub>2</sub>S (Dombkowski et al., 2004; Dombkowski et al., 2005; Olson, 2005), we noticed that these two stimuli evoked similar, if not identical, responses in a variety of vessels, irrespective of whether this response was contraction, relaxation, or multi-phasic. Because hypoxia and H<sub>2</sub>S also produced similar responses in trout urinary bladder (Dombkowski et al., 2006), this prompted us to investigate whether the relationship between these two stimuli in blood vessels was coincidental or if H<sub>2</sub>S might be involved in the hypoxic response. In the present study, we compared the effects of hypoxia and H<sub>2</sub>S (produced from dissolved NaHS or Na<sub>2</sub>S) on mechanical responses of respiratory and systemic vessels from a variety of vertebrates. We then selected four vessels for further study based on their individual responses to these two stimuli: lamprey dorsal aorta (mono-phasic constriction), rat thoracic aorta (mono-phasic relaxation) and rat and bovine pulmonary arteries (multi-phasic responses). In select vessels, we examined the interaction between hypoxia and H<sub>2</sub>S on mechanical responses of vessel rings, measured H<sub>2</sub>S production by homogenized vessels, and evaluated the effects of inhibiting H<sub>2</sub>S production or adding cysteine, the precursor for H<sub>2</sub>S synthesis, on the hypoxic response. We also examined the effects of hypoxia and H<sub>2</sub>S on smooth muscle transmembrane potential in bovine pulmonary arteries.

## Materials and methods

### Animals

Vessels from three animals, lamprey, rat, and bovine, were selected from the list compiled in Table 1 based on their distinct response to hypoxia and H<sub>2</sub>S. All animal procedures received IACUC approval.

Sea lamprey (*Petromyzon marinus* L., 130–450 g) were trapped in streams feeding into the Great Lakes during the spring-summer spawning season and airlifted to the Indiana University School of Medicine-South Bend (IUSM-SB) where they were maintained in 500-liter rectangular tanks with aerated, flowing well water (15°C) and exposed to a 12 h:12 h L:D photoperiod. They were not fed. Lampreys were anesthetized in benzocaine (1:5000, w/v) and the dorsal aortas were dissected out and placed in lamprey buffered saline at 4°C until use.

White Sprague Dawley rats *Rattus norvegicus* (Berkenhour) (Mammalia) were anesthetized with 50 mg/animal pentobarbital and the viscera was removed and placed in 4°C Krebs–Henseleit mammalian saline. The thoracic aorta and pulmonary (first–third generation) arteries were dissected out and stored at 4°C until use.

Holstein cow *Bos taurus* L. (Mammalia) lungs were obtained from a nearby abattoir, placed in 4°C Krebs–Henseleit

Table 1. Response of vertebrate vessels in vitro to hypoxia (N<sub>2</sub>) or hydrogen sulfide (H<sub>2</sub>S)

|           | Systemic       |                  | Respiratory    |                  |
|-----------|----------------|------------------|----------------|------------------|
|           | N <sub>2</sub> | H <sub>2</sub> S | N <sub>2</sub> | H <sub>2</sub> S |
| Rat       | –              | –                | +/-/+          | +/-/+            |
| Cow       | –              | –                | -/+            | -/+              |
| Duck      | +              | +                | -/+            | -/+              |
| Alligator | +              | +                | +/-/+          | +/-/+            |
| Toad      | +              | +                | +              | +                |
| Trout     | -/+/-          | -/+/-            | +              | +                |
| Shark     | –              | –                |                |                  |
| Lamprey   | +              | +                |                |                  |

White rat (*Rattus norvegicus*, Mammalia), Holstein cow (*Bos taurus*, Mammalia), Pekin duck (*Anas platyrhynchos domesticus*, Aves), American alligator (*Alligator mississippiensis*, Reptilia), marine toad (*Bufo marinus*, Amphibia), steelhead/rainbow trout (*Oncorhynchus mykiss*, Osteichthyes), sandbar shark (*Carcharhinus milberti*, Chondrichthyes), sea lamprey (*Petromyzon marinus*, Agnatha).

+, contraction; –, relaxation; symbols separated by / indicate multi-phasic responses. Modified in part from (Dombkowski et al., 2004; Dombkowski et al., 2005; Olson et al., 2001) and M.J.R., R.A.D. and K.R.O., unpublished observation. All responses represent vessels from at least four animals.

mammalian saline, and transported to IUSM-SB. The pulmonary arteries (fourth–sixth generation) were dissected out and stored at 4°C until use.

### Vessel myography

Vessels were cut into 3–8 mm-long segments, mounted on 280 µm-diameter stainless steel wire hooks and suspended in 5 ml water-jacketed smooth muscle baths filled with the appropriate buffer at the animal's physiological temperature (lamprey, 14°C; rat and bovine, 37°C). Lamprey vessels were aerated with room air, mammalian vessels were aerated with 95% air, 5% CO<sub>2</sub>. One hook was stationary; the other was connected to a Grass model FT03C force-displacement transducer (Grass Instruments, West Warwick, RI, USA). Tension was measured on a Grass Model 7E or 7F polygraph (Grass Instruments). Polygraph sensitivity was set to detect changes as small as 5 mg. Data was archived on a PC computer at 1 Hz using Labtech Notebook software (Laboratory Technologies Corp., Andover, MA, USA) or SoftWire (Measurement Computing, Middleboro, MA, USA). The chart recorders and software were calibrated prior to each experiment.

Length–tension relationships were derived from KCl-contracted vessels and used to apply an appropriate baseline (resting) tension (approximately 500–1500 mg) for 0.5–1 h prior to experimentation. In a typical experiment, vessels were contracted twice with 80 mmol l<sup>-1</sup> KCl and resting tension was re-established between rinses and prior to experimentation (~30–45 min each). Hypoxia (P<sub>O<sub>2</sub></sub> <5 mmHg) was achieved by aeration with 100% N<sub>2</sub> (lamprey) or 95% N<sub>2</sub>/5% CO<sub>2</sub>

(mammals). H<sub>2</sub>S was produced by dissolving NaHS or Na<sub>2</sub>S. In a number of experiments vessels were pre-contracted with KCl (lamprey aorta), norepinephrine (rat thoracic aorta and pulmonary artery) or the thromboxane A<sub>2</sub> mimetic, U-46619 (bovine pulmonary artery) agonist, prior to exposure to hypoxia or H<sub>2</sub>S. Previous experience in our laboratory has shown that these agonists and doses (50–80% of maximal contraction) produce optimal and sustained force in the different vessels. Enzyme inhibitors were added 20–30 min prior to further treatment.

#### *Hypoxia–H<sub>2</sub>S interactions*

To examine the interactions between hypoxia and H<sub>2</sub>S, vessels were exposed to one stimulus while in the presence of the other. Lamprey aortas were contracted with 80 mmol l<sup>-1</sup> KCl, washed, then exposed to hypoxia (N<sub>2</sub>). When the hypoxic contraction had stabilized, H<sub>2</sub>S was added to produce a final concentration of 3×10<sup>-4</sup> mol l<sup>-1</sup>. A second group of vessels was first exposed to H<sub>2</sub>S, then to N<sub>2</sub>. Rat thoracic aortas were treated with propranolol (10<sup>-5</sup> mol l<sup>-1</sup>) to block β-adrenoceptors then pre-contracted with norepinephrine (10<sup>-6</sup> mol l<sup>-1</sup>). When tension had stabilized they were exposed to either N<sub>2</sub> then H<sub>2</sub>S (3×10<sup>-4</sup> mol l<sup>-1</sup>) after the N<sub>2</sub> relaxation stabilized, or *vice versa*. Bovine pulmonary arteries were pre-contracted with U-46619 (10<sup>-8</sup> mol l<sup>-1</sup>) then N<sub>2</sub> followed by 3×10<sup>-4</sup> mol l<sup>-1</sup> H<sub>2</sub>S or *vice versa*. Both groups of bovine vessels were then re-oxygenated (air) and the hypoxia was repeated to evaluate recovery.

#### *Transmembrane potential*

The effects of hypoxia and H<sub>2</sub>S on transmembrane potential (*E<sub>m</sub>*) were measured in perfused bovine pulmonary arteries. Glass cannulae with matching tip diameters were inserted into each end of approximately 300 μm diameter, 15 mm long, vessels and secured with nylon suture. The vessels were immersed in Krebs–Henseleit buffer (37°C) in a water-jacketed chamber during cannulation and throughout the experiment. Side branches, if any, were tied off. A micrometer connected to the proximal cannula was used to take slack out of the artery and a pressure transducer connected close to this cannula allowed measurement of intravascular pressure. The inflow cannula reservoir was raised to produce an intravascular pressure of 10 mmHg and the vessels were continuously perfused and superfused with buffer aerated with 5% CO<sub>2</sub>-balance air. A color video camera mounted on a stereomicroscope above the vessel was used to project an image of the artery on a video monitor and the vessel diameter (±1.5 μm) was measured on screen using a video scaler. Reference points such as adhering connective tissue, side branches, etc. located near the site of measurement insured that the diameter was always measured at the same point on the vessel wall. Vessel diameters were measured immediately after mounting the artery, after equilibration, and throughout the experimental protocols.

Membrane potentials were measured with glass microelectrodes filled with 3 mol l<sup>-1</sup> KCl and having tip

resistances between 50–80 MΩ. Impalements were made from the adventitial side of the vessel. Criteria for a successful impalement was an abrupt negative drop in voltage when the electrode entered the cell, an immediate return to baseline upon withdrawal of the electrode, and no change in electrode resistance. Because it was difficult to keep the electrode in the cell during an active response, *E<sub>m</sub>* was measured in a number of cells before and after exposure to hypoxia or H<sub>2</sub>S. Hypoxia was produced by perfusing and superfusing the vessels with buffer aerated with 5% CO<sub>2</sub> and 95% N<sub>2</sub>. H<sub>2</sub>S in the form of NaHS (1 mmol l<sup>-1</sup>) was added directly to the perfusate and superfusate.

#### *H<sub>2</sub>S production*

Lamprey dorsal aortas were pooled from six fish and bovine pulmonary arteries and veins were pooled from two cows. The vessels were homogenized on ice in 50 mmol l<sup>-1</sup> phosphate buffer (pH 6.8; 1:9 tissue:buffer w/w). L-Cysteine (1 mmol l<sup>-1</sup> bovine, 10 mmol l<sup>-1</sup> lamprey) and pyridoxyl 5'-phosphate (2 mmol l<sup>-1</sup>) were added (Zhao et al., 2003) and the mixtures were placed in sealed syringes along with a glass mixing bead, avoiding air bubbles, and gently agitated on a rotary mixer for 18–24 h at room temperature. The homogenate was briefly centrifuged to remove tissue debris and 0.5 ml of supernatant was added to an equal volume of antioxidant buffer to convert all H<sub>2</sub>S gas and HS<sup>-</sup> anion to sulfide (S<sup>2-</sup>). Total sulfide anion was measured in triplicate samples with a sulfide electrode (Lazar Research Laboratories, Los Angeles, CA, USA) on a Fisher Accumet AR50 pH meter (Fisher Scientific, Pittsburgh, PA, USA). Inhibitors (see Hosoki et al., 1997; Zhao et al., 2003) of cystathionine β-synthase (CBS), amino-oxyacetate (AOA; 1 mmol l<sup>-1</sup>), cystathionine γ-lyase (CSE), D,L-propargylglycine (PPG; 10 mmol l<sup>-1</sup>) and β-cyanoalanine (BCA; 5 mmol l<sup>-1</sup>) and the general inhibitor of pyridoxyl 5'-phosphate-dependent enzymes, hydroxylamine (HA; 1 mmol l<sup>-1</sup>) (Kery et al., 1999), were added to bovine vessels simultaneously with L-cysteine and pyridoxyl 5'-phosphate.

#### *Contribution of the H<sub>2</sub>S precursor, cysteine, to hypoxic responses*

Lamprey aortas, bovine pulmonary arteries and rat thoracic aortas were prepared for myography as above, contracted twice with 80 mmol l<sup>-1</sup> KCl and washed. Bovine pulmonary arteries and rat aortas were pre-contracted with U-46619 (10<sup>-7</sup> mol l<sup>-1</sup>) before each hypoxic exposure. The vessels were then exposed to hypoxia for 15–20 min and returned to air, washed 2 times and resting tension re-established. Cysteine (1 mmol l<sup>-1</sup>) was added and 20 min later the procedure was repeated. As exogenous cysteine did not appear to be necessary for short-term hypoxic responses of bovine pulmonary arteries, paired vessels were exposed to hypoxia for over 15 h with or without cysteine, reoxygenated for 60 min and the U-46619 pre-contraction, hypoxia protocol repeated.

#### *Physiological salines*

Lamprey Hepes-buffered saline (in mmol l<sup>-1</sup>): 145 NaCl, 3

KCl, 0.57 MgSO<sub>4</sub>, 2 CaCl<sub>2</sub>, 5 glucose, 3 Hepes acid, and 7 Hepes Na<sup>+</sup> salt, pH 7.8.

Mammalian Krebs–Henseleit bicarbonate-buffered saline (in mmol l<sup>-1</sup>): 115 NaCl, 2.51 KCl, 2.46 MgSO<sub>4</sub>, 1.91 CaCl<sub>2</sub>, 5.56 glucose, 1.38 NaH<sub>2</sub>PO<sub>4</sub>, and 25 NaHCO<sub>3</sub>, pH 7.4.

#### Chemicals

Stock solutions were prepared as follows: U-46619; 0.01 mol l<sup>-1</sup>; and epinephrine, 0.01 mol l<sup>-1</sup>. Propranolol (final concentration 10<sup>-5</sup> mol l<sup>-1</sup>) was added to the baths 15 min prior to epinephrine to block β-adrenoreceptor-mediated relaxation (Olson and Meisheri, 1989). All drugs were dissolved in distilled H<sub>2</sub>O except U-46619, which was dissolved in 95% ethanol. Ethanol was not vasoactive at the concentrations used in these studies. Anti-oxidant buffer for the total H<sub>2</sub>S assay was made of 15.6 mmol l<sup>-1</sup> sodium salicylate, 3.7 mmol l<sup>-1</sup> ascorbic acid and 21 mmol l<sup>-1</sup> NaOH (pH >12). Unless otherwise stated all chemicals were purchased from Sigma-Aldrich Co. (St Louis, MO, USA).

#### Data analysis

Dose–response curves were fit for individual vessels with Table Curve software (Jandel, Chicago, IL, USA). Statistical comparisons were made using Student's *t*-test or paired *t*-test where appropriate. One-way ANOVA followed by Student–Newman–Keul's test was used for multiple comparisons of means. Values are means ± s.e.m. Significance was assumed when *P* ≤ 0.05.

## Results

### Myography

Table 1 compares the *in vitro* vascular response to hypoxia and H<sub>2</sub>S in systemic and respiratory vessels in at least one animal from each vertebrate class. In some vessels both hypoxia and H<sub>2</sub>S produced a mono-phasic contraction, in others a mono-phasic relaxation, and in others the response is multi-phasic. However, irrespective of the pattern of response, in each vessel the effects of hypoxia and H<sub>2</sub>S were essentially identical. This is further illustrated in Fig. 1, where both stimuli produced a mono-phasic contraction in lamprey dorsal aorta (Fig. 1A), a mono-phasic relaxation in rat thoracic aorta (Fig. 1B), and a multi-phasic, contraction–relaxation–contraction, in rat pulmonary artery (Fig. 1C). In bovine pulmonary artery (Fig. 1D), hypoxia produced a slight relaxation followed by a sustained contraction, whereas the H<sub>2</sub>S contraction appeared to be mono-phasic. However, as shown in Fig. 2, H<sub>2</sub>S produced two different dose-dependent responses in bovine pulmonary arteries: relaxation at low concentrations and contraction at high concentrations. Between 10<sup>-5</sup> mol l<sup>-1</sup> and 10<sup>-3</sup> mol l<sup>-1</sup>, H<sub>2</sub>S produced a bi-phasic relaxation followed by contraction. The response to 10<sup>-4</sup> mol l<sup>-1</sup> H<sub>2</sub>S was similar to that produced by hypoxia in Fig. 1D.

The responses of lamprey aorta, rat thoracic aorta and bovine pulmonary arteries to H<sub>2</sub>S during hypoxia and to hypoxia during exposure to H<sub>2</sub>S are shown in Fig. 3. Individually, hypoxia and H<sub>2</sub>S produced the same magnitude of contraction

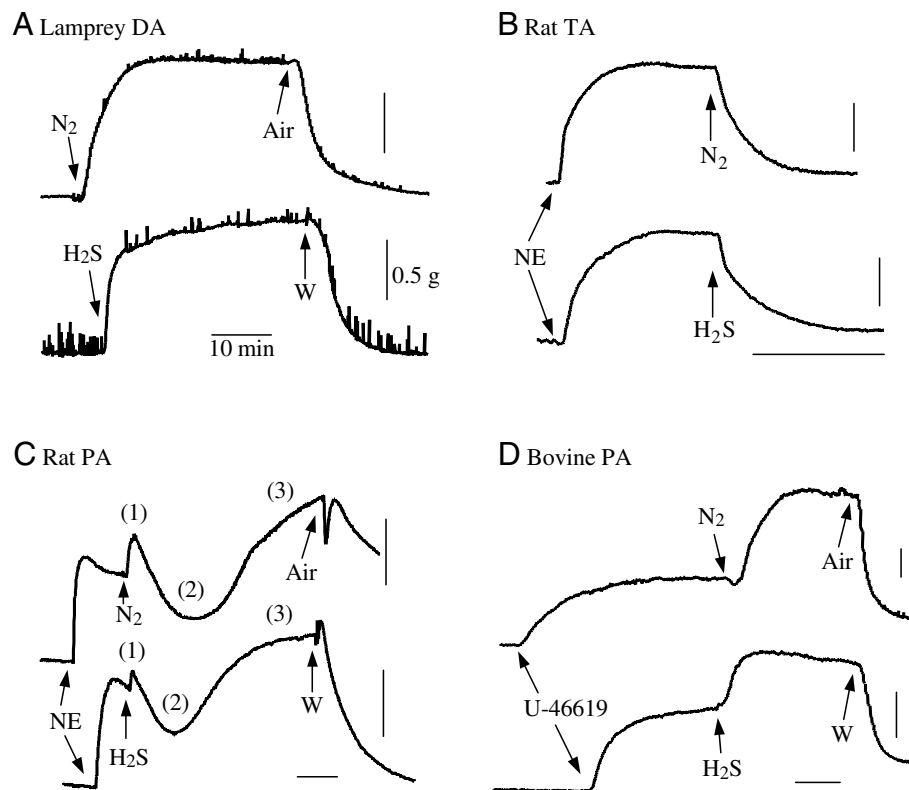

Fig. 1. The response of isolated vessels to hypoxia (N<sub>2</sub>) or H<sub>2</sub>S (1 mmol l<sup>-1</sup>) is temporally and spatially similar, but vessel-specific. (A) Lamprey dorsal aorta (DA), (B) rat thoracic aorta (TA), (C) rat pulmonary artery (PA) pre-contracted with 10<sup>-6</sup> mol l<sup>-1</sup> norepinephrine (NE), (D) bovine pulmonary artery (PA) pre-contracted with 10<sup>-7</sup> mol l<sup>-1</sup> U-46619. A slight relaxation of bovine PA often precedes the hypoxic contraction; the H<sub>2</sub>S contraction appears mono-phasic, but it also is multi-phasic (see Fig. 2). Horizontal lines=10 min; vertical lines=0.5 g tension; W=wash. (1), (2) and (3) in C, indicate stages in the multiphasic response. (A) N<sub>2</sub> trace adapted from (Olson et al., 2001), with permission; (C) H<sub>2</sub>S trace adapted from Dombkowski et al. (Dombkowski et al., 2005), with permission.



Fig. 2. H<sub>2</sub>S has two dose-dependent effects on pre-contracted (10<sup>-7</sup> mol l<sup>-1</sup> U-46619) bovine pulmonary arteries. H<sub>2</sub>S appears to produce a dose-dependent relaxation between 10<sup>-8</sup> and 10<sup>-5</sup> mol l<sup>-1</sup>, whereas above 10<sup>-5</sup> mol l<sup>-1</sup> it produces a dose-dependent constriction. The EC<sub>50</sub> for relaxation (5.5±1.8×10<sup>-7</sup> mol l<sup>-1</sup>) is significantly (*P*≤0.05) different from the EC<sub>50</sub> for contraction (3.7±1.5×10<sup>-4</sup> mol l<sup>-1</sup>). (A) Single trace of cumulative doses; arrowheads indicate log[H<sub>2</sub>S] (in mol l<sup>-1</sup>) and time of addition of U-46619; W=wash. (B) Relaxation (filled circles); contraction (open squares; values extrapolated where curves overlap ~10<sup>-5</sup> mol l<sup>-1</sup>). Values are means ± s.e.m. of 8 vessels. Stippled rectangle indicates range of H<sub>2</sub>S reported in the rat plasma (see text for details).

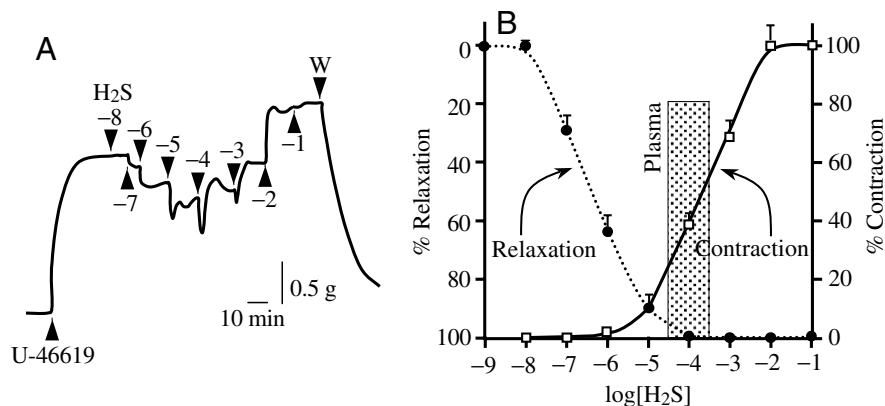

in lamprey dorsal aorta (Fig. 3A), whereas H<sub>2</sub>S applied during hypoxia produced a slight relaxation and a hypoxic contraction was significantly inhibited by prior application of H<sub>2</sub>S. In rat thoracic aorta, H<sub>2</sub>S produced a slight contraction when applied during hypoxia and hypoxic relaxation was inhibited by exposure to H<sub>2</sub>S (Fig. 3B); similar results were obtained from seven other vessels. Hypoxia- and H<sub>2</sub>S-mediated contractions of bovine pulmonary arteries were reversed to a relaxation when the vessels were previously treated with the other stimulus (Fig. 3C); after approximately 30 min aeration with air (95% air, 5% CO<sub>2</sub>) both hypoxic and H<sub>2</sub>S contractions were restored; similar results were obtained from seven other vessels.

*Transmembrane potential*

Table 2 shows the effect of hypoxia and H<sub>2</sub>S on resting transmembrane potential (*E<sub>m</sub>*) and diameter in bovine pulmonary arteries. Hypoxia and H<sub>2</sub>S produced essentially identical depolarization and constriction.

*H<sub>2</sub>S production*

Homogenates of lamprey aortas and bovine pulmonary arteries and veins produced H<sub>2</sub>S (H<sub>2</sub>S+HS<sup>-</sup>) when incubated with cysteine and pyridoxyl 5'-phosphate (Fig. 4). H<sub>2</sub>S production by lamprey vessels was twice that of bovine vessels. H<sub>2</sub>S production by bovine pulmonary arteries was not significantly affected by the cystathionine γ-lyase (CSE)

Fig. 3. The effects of hypoxia (N<sub>2</sub>) and H<sub>2</sub>S are mutually competitive. (A) Individually, N<sub>2</sub> and H<sub>2</sub>S produce similar contraction of lamprey dorsal aorta (DA; normalized to 80 mmol l<sup>-1</sup> KCl contraction=100%) while in the presence of N<sub>2</sub>, H<sub>2</sub>S (3×10<sup>-4</sup> mol l<sup>-1</sup>) relaxes and in the presence of H<sub>2</sub>S, N<sub>2</sub> contractions are significantly (*P*≤0.05; *N*=8 vessels) reduced. (B) In norepinephrine (NE; 10<sup>-6</sup> mol l<sup>-1</sup>) pre-contracted rat thoracic aortas initial exposure to hypoxia (N<sub>2</sub>; top trace) or H<sub>2</sub>S (3×10<sup>-4</sup> mol l<sup>-1</sup>; bottom trace) produces a typical relaxation, whereas subsequent application of either H<sub>2</sub>S (top) or hypoxia (bottom) results in either a slight contraction or no response. (C) In U-46619 (10<sup>-6</sup> mol l<sup>-1</sup>)-contracted bovine pulmonary arteries, 3×10<sup>-4</sup> mol l<sup>-1</sup> H<sub>2</sub>S relaxes a pre-existing N<sub>2</sub> contraction and N<sub>2</sub> relaxes a pre-existing H<sub>2</sub>S contraction. H<sub>2</sub>S is lost from continuously aerated baths in C after which normal hypoxic contractions are restored. Values are means ± s.e.m., *N*=8 vessels; horizontal and vertical scale bars in B and C = 10 min and 0.5 g, respectively.

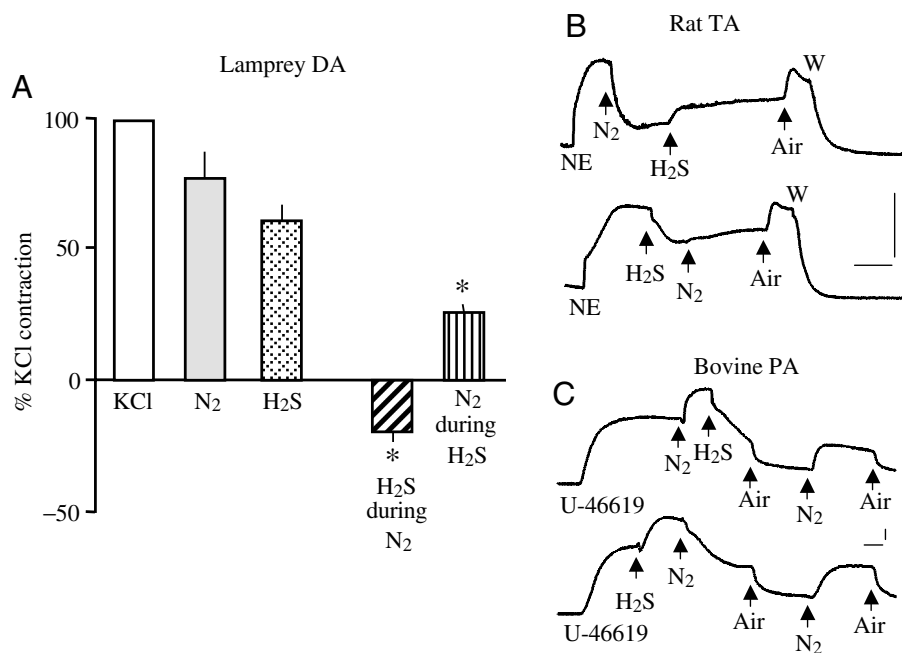

Table 2. Effect of hypoxia and  $H_2S$  ( $1 \text{ mmol l}^{-1}$ ) on transmembrane potential ( $E_m$ ) and percent reduction in diameter (contraction) in bovine pulmonary arteries ( $\sim 300 \mu\text{m}$  diameter)

|         | $E_m$                   | Contraction (%)      |
|---------|-------------------------|----------------------|
| Control | $-55 \pm 0.4$ (18/8/4)  |                      |
| Hypoxia | $-45 \pm 0.7$ (13/8/4)* | $6.8 \pm 0.7$ (10/5) |
| $H_2S$  | $-44 \pm 0.4$ (14/7/4)* | $7.9 \pm 0.8$ (10/5) |

Values are means  $\pm$  s.e.m. (number of vessels impaled/number of arteries/number of cows, or number of arteries/number of cows). \*Significantly different from control; effects of hypoxia and  $H_2S$  were not significantly different from each other.

inhibitor, D,L-propargylglycine (PPG), whereas it was significantly reduced by the cystathionine  $\beta$ -synthase (CBS) inhibitor, amino-oxyacetate (AOA). A combination of AOA and PPG was no more effective than AOA alone.  $H_2S$  production by pulmonary arteries and veins was inhibited by a mixture of AOA, PPG and the pyridoxyl 5'-phosphate-dependent enzyme inhibitor, hydroxylamine (HA). The three inhibitors combined were no more effective in pulmonary arteries than AOA alone.

#### Inhibition of $H_2S$ synthesis and the hypoxic response

The effect of inhibitors of  $H_2S$  synthesis on the hypoxic response of lamprey and rat aortas and rat and bovine pulmonary arteries is shown in Fig. 5. In all vessels the

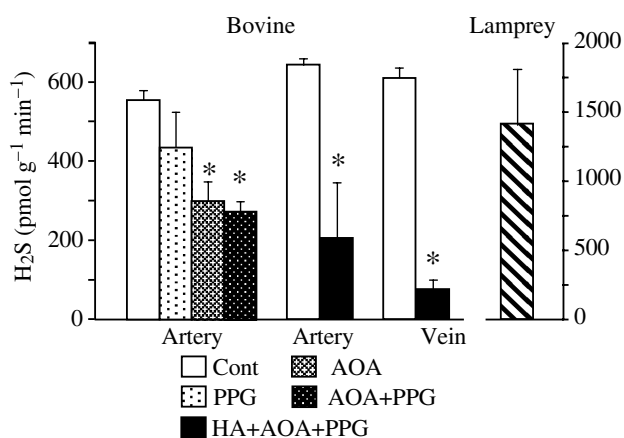

Fig. 4.  $H_2S$  is produced by homogenates of bovine pulmonary artery and vein and lamprey dorsal aorta.  $H_2S$  production by pulmonary arteries is inhibited by the CBS inhibitor, amino-oxyacetate (AOA;  $1 \text{ mmol l}^{-1}$ ), the pyridoxyl 5'-phosphate-dependent enzyme inhibitor, hydroxylamine (HA;  $1 \text{ mmol l}^{-1}$ ), but not by the CSE inhibitor D,L-propargylglycine (PPG;  $10 \text{ mmol l}^{-1}$ ); HA also inhibits  $H_2S$  production in veins. Bovine vessels were pooled from two animals, lamprey aortas were pooled from six fish. Total sulfide ( $H_2S$  and  $HS^-$ ) was measured in triplicate with ion-selective electrodes after alkaline conversion to  $S^{2-}$ . Values are means  $\pm$  s.e.m.; \*significantly different from respective control ( $P \leq 0.05$ ).

response to hypoxia was partially or completely blocked by inhibitors of  $H_2S$  synthesis. The magnitude of hypoxic vasoconstriction in lamprey dorsal aorta was unchanged after three consecutive exposures to hypoxia (Fig. 5A, left bars), whereas in a second set of vessels, application of the pyridoxyl 5'-phosphate-dependent enzyme inhibitor, hydroxylamine (HA), after the initial hypoxia reduced the subsequent hypoxic vasoconstriction by over 80% (Fig. 5A, right bars). In otherwise untreated lamprey aortas,  $1 \text{ mmol l}^{-1}$  HA produced a contraction that was  $31 \pm 3\%$  ( $N=12$ ) of a  $80 \text{ mmol l}^{-1}$  KCl contraction (not shown). In norepinephrine (NE;  $10^{-5} \text{ mol l}^{-1}$ ) pre-contracted rat thoracic aorta, hypoxic vasodilation was nearly completely blocked by the CSE inhibitor D,L-propargylglycine (PPG; Fig. 5B) and in NE pre-contracted rat pulmonary arteries, both the hypoxic phase 1 contraction and phase 2 relaxation were partially inhibited by the CSE inhibitor,  $\beta$ -cyanoalanine (BCA; Fig. 5C). In rat pulmonary arteries, a combination of BCA, PPG and the CBS inhibitor amino-oxyacetate (AOA) was no more effective than BCA alone. Hypoxic vasoconstriction in U-46619 pre-contracted bovine pulmonary arteries was unaffected by the CSE inhibitor, PPG, but partly ( $\sim 60\%$ ) blocked by AOA, converted to slight relaxation by HA and a strong relaxation by a combination of the three inhibitors (Fig. 5D). In U-46619 contracted bovine pulmonary arteries, the initial application of AOA produced a brief ( $< 5 \text{ min}$ ) contraction that was only  $3.5 \pm 1\%$  ( $N=8$ ) of a KCl ( $80 \text{ mmol l}^{-1}$ ) contraction (not shown). HA had no effect on un-stimulated bovine pulmonary arteries, but it completely relaxed U-46619 ( $10^{-7} \text{ mol l}^{-1}$ ) contracted arteries (not shown). Between  $10^{-7} \text{ mol l}^{-1}$  and  $3 \times 10^{-5} \text{ mol l}^{-1}$ , HA produced a dose-dependent relaxation of KCl-contracted bovine pulmonary arteries that was equivalent to a  $13 \pm 3\%$  ( $N=8$ ) reduction of a KCl contraction. HA between  $3 \times 10^{-5} \text{ mol l}^{-1}$  and  $3 \times 10^{-3} \text{ mol l}^{-1}$  produced a dose-dependent contraction of the same vessels (not shown). At  $10^{-3} \text{ mol l}^{-1}$ , the HA contraction was equivalent to  $6 \pm 5\%$  of a  $80 \text{ mmol l}^{-1}$  KCl contraction.

#### Contribution of the $H_2S$ precursor, cysteine, to hypoxic responses

The contribution of cysteine to hypoxic vasoconstriction and dilation is shown in Fig. 6. Addition of  $1 \text{ mmol l}^{-1}$  cysteine to lamprey aortas produced a slight contraction, doubled the strength of the hypoxic contraction, but did not affect the strength of the KCl contraction (Fig. 6A). Glycine ( $1 \text{ mmol l}^{-1}$ ) also produced a slight contraction of lamprey aortas, but did not affect the strength of either hypoxic or KCl contractions (Fig. 6A). Exogenous cysteine did not appear to affect either the magnitude or rate of hypoxic relaxation of rat thoracic aortas (not shown). However, rat aortas incubated with cysteine contracted immediately upon re-oxygenation, whereas control vessels exhibited a transient further relaxation before contracting (not shown). The effects of cysteine incubation during long-term (15 h) hypoxia on subsequent hypoxic responses of rat aortas is shown in Fig. 6B. The magnitude of a U-46619 pre-contraction was increased by  $\sim 50\%$  after 15 h

Fig. 5. Constrictory and dilatory responses of isolated vessels to hypoxia (stippled bars) is partially or completely prevented by inhibition of H<sub>2</sub>S synthesis (black bars). (A) Hypoxic vasoconstriction in lamprey dorsal aorta (DA; *N*=8) is unaffected by three consecutive bouts of N<sub>2</sub> exposure (left bars), whereas 1 mmol l<sup>-1</sup> of the pyridoxyl 5'-phosphate-dependent enzyme inhibitor, hydroxylamine (HA), reduces the N<sub>2</sub> response by over 80%. (B) Hypoxic vasodilation of norepinephrine (NE; 10<sup>-5</sup> mol l<sup>-1</sup>) pre-contracted rat thoracic aorta (TA) is nearly completely blocked by PPG (*N*=6). (C) In NE pre-contracted rat pulmonary arteries (PA), both the hypoxic phase 1 contraction (1) and phase 2 relaxation (2) are partially inhibited by the CSE inhibitor, β-cyanoalanine (BCA; 5 mmol l<sup>-1</sup>) or a combination of 1 mmol l<sup>-1</sup> AOA, 10 mmol l<sup>-1</sup> BCA and 10 mmol l<sup>-1</sup> PPG (*N*=8 each group). (D) Hypoxic vasoconstriction in 10<sup>-7</sup> μmol l<sup>-1</sup> U-46619 pre-contracted (contraction not shown) bovine pulmonary arteries is unaffected by the CSE inhibitor D,L-propargylglycine (PPG; 10 mmol l<sup>-1</sup>), partly blocked by the CBS inhibitor amino-oxyacetate (AOA; 1 mmol l<sup>-1</sup>) and converted to slight relaxation by HA and a strong relaxation by a combination of the three inhibitors (*N*=6 each group). Values are means ± s.e.m.; \*significantly different from respective control (*P*≤0.05).

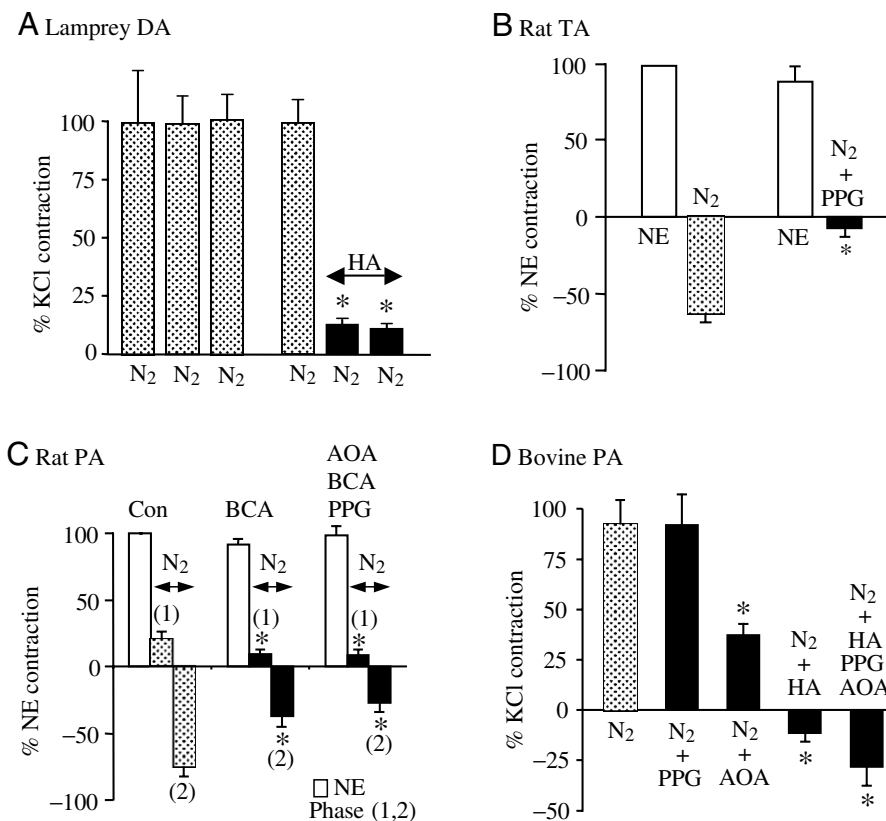

hypoxia (*P*≤0.05, *N*=16) and this was unaffected by the presence or absence of cysteine. Cysteine treatment significantly decreased the magnitude of the hypoxic relaxation (from 42±2% to 32±2% relaxation of the U-46619 contraction; control vs cysteine, respectively). Cysteine treatment did not affect the magnitude of the initial force recovered during re-oxygenation (262±138 mg vs 259±63 mg, control vs cysteine), but enabled the vessels to maintain tension during a 25 min recovery, whereas control vessels relaxed to baseline. A transient relaxation preceding re-oxygenation recovery was observed in control, but not cysteine-treated vessels; these responses were similar to those described above in vessels that were not exposed to 15 h hypoxia. Control vessels did not respond to a second hypoxic exposure, whereas hypoxic relaxation could be repeated in cysteine-treated vessels (Fig. 6B). Cysteine-treated vessels also relaxed when washed with U-46619-free buffer; control vessels did not (Fig. 6B). The apparent inability of control vessels to respond at the end of this experiment was not due to damage to the vessel as this protocol (U-46619 contraction, two consecutive hypoxia treatments and wash) could be repeated on both groups of vessels with identical results (not shown). Addition of cysteine to bovine pulmonary arteries did not affect the magnitude of a subsequent hypoxic contraction (not shown). However, after 15 h of hypoxia (Fig. 6C), hypoxic contraction of pulmonary arteries incubated with 1 mmol l<sup>-1</sup> cysteine for 15 h was twice

that of control vessels. Both cysteine-treated and control vessels relaxed upon re-oxygenation. Force developed during a second hypoxic exposure was not significantly different between the two groups, but the control vessels could not sustain the contraction (by 30 min they were completely relaxed) whereas cysteine-treated vessels were able to sustain the hypoxic vasoconstriction (at 30 min they retained 55% of their contractile force; Fig. 6C).

### Discussion

Our experiments indicate that: (1) in at least one species from each vertebrate class, the vascular response to hypoxia and H<sub>2</sub>S is similar, if not identical; (2) hypoxia and H<sub>2</sub>S have essentially identical depolarizing effects on transmembrane potential; (3) the effects of hypoxia and H<sub>2</sub>S seem to be competitive, in the presence of one stimulus, vascular responses to the second are greatly reduced or inhibited; (4) H<sub>2</sub>S is vasoactive at physiologically relevant concentrations; (5) H<sub>2</sub>S is produced by blood vessels *via* enzymatically mediated mechanisms; (6) hypoxic vasoconstriction and hypoxic vasodilation are partially or completely blocked by inhibitors of H<sub>2</sub>S synthesis; (7) addition of cysteine, the precursor for H<sub>2</sub>S production, enhances the hypoxic response. These results satisfy the criteria that H<sub>2</sub>S is a biologically relevant gasotransmitter (Wang, 2002) in a variety of vertebrate blood vessels. Although

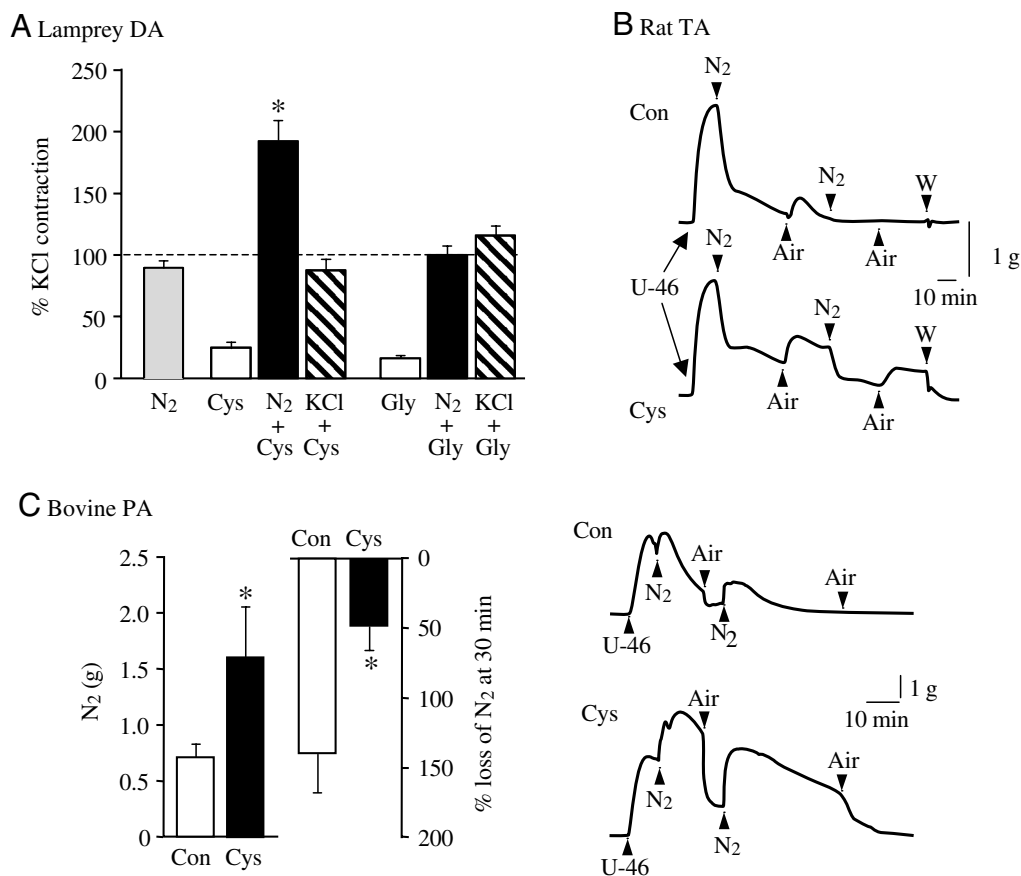

Fig. 6. Contribution of the H<sub>2</sub>S precursor, cysteine, to hypoxic responses. (A) Addition of cysteine to lamprey dorsal aorta (DA) significantly and specifically increases the magnitude of a hypoxic contraction. In the absence of exogenous cysteine, a hypoxic contraction (N<sub>2</sub>) develops as much force as a reference 80 mmol l<sup>-1</sup> KCl contraction (broken line). Addition of cysteine (Cys; 1 mmol l<sup>-1</sup>) produces a slight, transient contraction, doubles the strength of the hypoxic contraction (N<sub>2</sub>+Cys;  $P \leq 0.05$ ), but does not affect a second KCl contraction. Addition of glycine (Gly; 1 mmol l<sup>-1</sup>) also produced a slight contraction but did not affect either hypoxic (N<sub>2</sub>+GLY) or KCl (KCl+Gly) contractions. (B) Rat thoracic aortas (TA) were exposed to hypoxia for 15 h in the absence (Con) or presence of cysteine (Cys), returned to normoxia, pre-contracted with U-46619, and exposed twice to hypoxia. Incubation with cysteine significantly ( $P \leq 0.05$ ) reduced the magnitude of the first hypoxic relaxation but enabled the vessels to respond to re-oxygenation and a second hypoxia. (C) Bovine pulmonary arteries (PA) were exposed to hypoxia for 15 h in the absence (Con) or presence of cysteine (Cys), returned to normoxia, pre-contracted with U-46619, and exposed twice to hypoxia. Incubation with cysteine increased the magnitude of the initial hypoxic contraction and the second hypoxic contraction was sustained longer.

considerable work remains to be done, our experiments also suggest that H<sub>2</sub>S, or more likely the metabolism of H<sub>2</sub>S, is an important component in the O<sub>2</sub> sensing/signal transduction cascade involved in the hypoxic response.

#### *Vessel responses to hypoxia and H<sub>2</sub>S are virtually identical*

Vertebrate vessels from various species and from various vascular beds within the same species exhibit their own unique response to hypoxia, mono-phasic relaxations and mono or multi-phasic contraction. In every vessel we have examined thus far (Table 1, Fig. 1), as well as in studies by others (Olson et al., 2001; Zhao et al., 2001; Zhao and Wang, 2002; Dombkowski et al., 2005), the responses to H<sub>2</sub>S are essentially identical to those produced by hypoxia. In lamprey dorsal aortas both hypoxia and H<sub>2</sub>S produce a mono-phasic contraction (Fig. 1A) and both are dose-dependent (Olson et

al., 2001; Dombkowski et al., 2005). In rat thoracic aorta these stimuli produce a mono-phasic, dose-dependent relaxation (Fig. 1B) (Zhao et al., 2001; Zhao and Wang, 2002). When hypoxia produces a multi-phasic response, so does H<sub>2</sub>S. This similarity between hypoxic and H<sub>2</sub>S responses is quite striking in rat pulmonary arteries where both stimuli produce an identical complex tri-phasic contraction-relaxation-contraction (Fig. 1C). To our knowledge only hypoxia and H<sub>2</sub>S produce this characteristic tri-phasic response in rat pulmonary vessels. In bovine pulmonary arteries, hypoxia and H<sub>2</sub>S (Fig. 1D and Fig. 3C, respectively) often produce a slight, transient dilation that precedes the sustained contraction.

The similarity between the effects of H<sub>2</sub>S and hypoxia in both pulmonary and systemic vessels suggests that H<sub>2</sub>S and hypoxia may share common activation pathways. Furthermore,



because we have observed identical effects of hypoxia and H<sub>2</sub>S in vessels from at least one species in each vertebrate class (Table 1), we propose that H<sub>2</sub>S mediation of a hypoxic response is common throughout vertebrate phylogeny and that it was a primordial feature of the earliest vertebrate vessels.

#### *Vessel responses to hypoxia and H<sub>2</sub>S are competitive*

In addition to the similarity in the form of the response, in our experience in a variety of vessels, hypoxia and H<sub>2</sub>S have been the only two stimuli whose effects are eliminated or reversed by pre-existing exposure to the other stimulus, whereas their response to other agonists is generally not affected (Fig. 3). These studies suggest that hypoxia and H<sub>2</sub>S share a common and unique pathway in the excitation–contraction process that, when activated by one stimulus, cannot be further activated by the other.

In lamprey aorta (Fig. 3A), hypoxic and H<sub>2</sub>S contractions are 76 and 60%, respectively, of an 80 mmol l<sup>-1</sup> KCl contraction. Exposing the vessel to H<sub>2</sub>S during a hypoxic contraction results in a small relaxation. Exposing the vessel to hypoxia during an H<sub>2</sub>S contraction results in a contraction whose magnitude is less than 25% of the KCl contraction. By comparison, when lamprey aortas are pre-contracted with either 80 mmol l<sup>-1</sup> KCl, or 10<sup>-6</sup> mol l<sup>-1</sup> epinephrine, the contractions produced by hypoxia (Olson et al., 2001) and H<sub>2</sub>S (Dombkowski, 2006) are not diminished. In norepinephrine pre-contracted rat thoracic aortas, where initial exposure to either hypoxia or H<sub>2</sub>S produces a characteristic relaxation, subsequent treatment with the other stimulus (H<sub>2</sub>S or hypoxia, respectively) fails to relax, and in fact elicits a slight contraction (Fig. 3B). The inability of the second stimulus to produce additional relaxation is not due to a mechanical property of the vessel because the vessel is not completely relaxed by the first stimulus. In bovine pulmonary arteries, both hypoxia and H<sub>2</sub>S produce a monophasic contraction that is additive to a pre-existing U-46619 contraction (Fig. 3C). However, secondary application of H<sub>2</sub>S during hypoxia relaxes the hypoxic constriction and hypoxia relaxes the H<sub>2</sub>S contraction (Fig. 3C). Thus the effects of hypoxia and H<sub>2</sub>S appear to be uniquely competitive in both systemic and pulmonary vessels.

What is not yet clear is why in some instances the second stimulus not only inhibited, but reversed the effects of the first, i.e. H<sub>2</sub>S reversed hypoxic contraction in the lamprey aorta (Fig. 3A) and bovine pulmonary artery (Fig. 3C) and hypoxic relaxation in the rat thoracic aorta (Fig. 3B) and hypoxia reversed the H<sub>2</sub>S contraction in bovine pulmonary arteries (Fig. 3C). This effect may be due to different conditions produced by endogenous (hypoxia-mediated) and exogenous H<sub>2</sub>S (NaHS or Na<sub>2</sub>S), which could affect the magnitude and direction of the relative fluxes of H<sub>2</sub>S gas and HS<sup>-</sup> across the cell membrane. Similarly, when vessels are made hypoxic during H<sub>2</sub>S treatment, actual [H<sub>2</sub>S] may be greater than exogenous [H<sub>2</sub>S] alone. This question may not be resolved until it is understood how exogenous and endogenous H<sub>2</sub>S interact and how H<sub>2</sub>S gas and HS<sup>-</sup> move across cell membranes and mediate cellular responses.

#### *Hypoxia and H<sub>2</sub>S have similar effects on E<sub>m</sub>*

Hypoxia and H<sub>2</sub>S have similar effects on vascular smooth muscle transmembrane potential (*E<sub>m</sub>*); both hyperpolarize systemic vessels (Lombard et al., 1999; Frisbee et al., 2001; Zhao et al., 2001) and depolarize respiratory (bovine pulmonary) arteries (Table 2). Whether this means that both stimuli act through a common pathway is not known. While it is tempting to associate a change in *E<sub>m</sub>* with intracellular [Ca<sup>2+</sup>]<sub>i</sub> ([Ca<sup>2+</sup>]<sub>i</sub>) and relaxation or contraction, it is not clear if this is always the case. In a number of systemic vessels a substantial portion of hypoxic vasodilation is independent of [Ca<sup>2+</sup>]<sub>i</sub> (Thorne et al., 2002) and vessels contracted with high (≥80 mmol l<sup>-1</sup>) KCl can still relax to hypoxia (Pearce et al., 1989; Shimizu et al., 2000). Similarly, the relaxant effect of H<sub>2</sub>S in rat aortas has been shown to be only partially mediated by K<sup>+</sup> (K<sub>ATP</sub>) channels and it requires extracellular Ca<sup>2+</sup> (Zhao et al., 2001; Zhao and Wang, 2002). In rat pulmonary arteries cell depolarization can be uncoupled from the rise in [Ca<sup>2+</sup>]<sub>i</sub> (Gelband and Gelband, 1997) and Ca<sup>2+</sup> may enter the cell *via* voltage-independent (capacitative Ca<sup>2+</sup>) pathways (Robertson et al., 2000). Both hypoxic pulmonary vasoconstriction in the rat (Robertson et al., 2000) and hypoxic vasoconstriction in the lamprey aorta (Olson et al., 2001) can occur in the presence of elevated extracellular [K<sup>+</sup>]. Thus, the mechanism(s) responsible for the change in *E<sub>m</sub>* during H<sub>2</sub>S exposure remain to be elucidated.

#### *Vessels produce H<sub>2</sub>S enzymatically*

H<sub>2</sub>S production has now been demonstrated in vessels from lamprey (Fig. 4), rainbow trout (Dombkowski, 2006), rat (Hosoki et al., 1997; Zhao et al., 2001; Zhao et al., 2003; Wang et al., 2004) and cow (Fig. 4). This suggests that H<sub>2</sub>S synthesis is a general property of vertebrate vascular smooth muscle.

Cysteine is the major source of H<sub>2</sub>S production in mammals (Maclean and Kraus, 2004) and cysteine was added to our tissue homogenates to produce optimal enzymatic activity (S.K.H., N.L.W. and K.R.O., unpublished observation). A number of enzymes desulfurate cysteine. These include cystathionine β-synthase (CBS; EC 4.2.1.22), cystathionine (γ-lyase (CSE; EC 4.4.1.1), cysteine aminotransferase (EC 2.6.1.3), mercaptopyruvate sulfurtransferase (MST; EC 2.8.1.2), rhodanase (thiosulfate cyanide sulfurtransferase; EC 2.8.1.1) and cysteine lyase (EC 4.2.1.10) (Maclean and Kraus, 2004; Stipanuk, 2004). Most vascular studies have focused on CSE and CBS as the potential H<sub>2</sub>S-generating enzymes, although other enzymes may also be involved (Maclean and Kraus, 2004).

CSE is thought to be the primary enzyme for H<sub>2</sub>S synthesis in mammalian vessels. CSE mRNA has been identified in human systemic vessels and rat pulmonary arteries; in rat systemic vessels, both CSE mRNA and the 43 kDa CSE protein have been identified (Hosoki et al., 1997; Zhao et al., 2003; Cheng et al., 2004; Wang et al., 2004). We have also found CSE mRNA in systemic arteries, veins and respiratory vessels of trout (R. Wang, R.A.D. and K.R.O., unpublished observation). Unlike nitric oxide synthase and hemeoxygenase,

CSE mRNA in rat vessels is confined to vascular smooth muscle and is absent from the endothelium (Wang et al., 2004). The CSE inhibitor, propargyl glycine (PPG), inhibits H<sub>2</sub>S production in rat vessels (Hosoki et al., 1997; Zhao et al., 2003), but in bovine pulmonary arteries PPG did not significantly affect either H<sub>2</sub>S production (Fig. 4), or hypoxic contraction (Fig. 5). This suggests that enzymes other than CSE also contribute to vascular H<sub>2</sub>S production.

Previous studies have indicated that CBS is not involved in H<sub>2</sub>S synthesis in mammalian vessels. CBS mRNA has not been detected in mammalian (rat and human) vessels and the CBS inhibitor, aminooxyacetic acid (AOA) did not block H<sub>2</sub>S production by rat vessel homogenates (Hosoki et al., 1997; Zhao et al., 2001; Zhao et al., 2003; Wang et al., 2004). However, our findings suggest that in a number of vertebrates, CBS and perhaps other enzymes are important in vascular H<sub>2</sub>S production. AOA partially inhibits H<sub>2</sub>S production in homogenized bovine pulmonary arteries and veins (Fig. 4), and trout arteries and veins (Dombkowski, 2006), and it partially inhibits the hypoxic contraction of bovine pulmonary arteries (Fig. 5). We have also found that CBS mRNA is ubiquitously expressed in trout systemic arteries, veins and respiratory vessels (R. Wang, R.A.D. and K.R.O., unpublished observation). Collectively, these studies suggest that CBS is also involved in vascular H<sub>2</sub>S production.

Although we did not systematically examine all enzyme inhibitors in all vessels, hydroxylamine appeared to have the greatest inhibitory effect on H<sub>2</sub>S production and hypoxic responses. CBS, CSE and cysteine lyase all depend on the co-factor, pyridoxal 5'-phosphate (PLP) for enzymatic activity (Maclean and Kraus, 2004, and as hydroxylamine is a general inhibitor of PLP-dependent enzymes (Kery et al., 1999), it is possible that multiple enzymes contribute to H<sub>2</sub>S production in some vessels.

#### *Inhibition of H<sub>2</sub>S production inhibits hypoxic vasoconstriction and hypoxic vasodilation*

The inhibition of both hypoxic vasoconstriction and hypoxic vasodilation by inhibitors of H<sub>2</sub>S synthesis (Fig. 5) further supports the hypothesis that the vascular response to hypoxia and H<sub>2</sub>S are interrelated. These studies also suggest that H<sub>2</sub>S synthesis may depend on different, even vessel-specific, enzymes and that other enzymes, in addition to CBS and CSE, may be involved in H<sub>2</sub>S production. PPG, which inhibits CSE and H<sub>2</sub>S production by rat aorta (Zhao et al., 2003), essentially abolished hypoxic vasodilation in rat thoracic aortas (Fig. 5B) and the CSE inhibitor β-cyano-L-alanine (BCA), partially inhibited hypoxic phase 1 contraction and phase 2 relaxation in rat pulmonary arteries and was no less effective than AOA, BCA and PPG combined. However, CBS appears to account for at least part of the hypoxic generation of H<sub>2</sub>S by bovine pulmonary arteries as the CBS inhibitor, AOA, reduced hypoxic vasoconstriction by 50%, whereas the CSE inhibitor, PPG, was ineffective (Fig. 5D). This is consistent with the predominance of CBS in H<sub>2</sub>S synthesis by these vessels (Fig. 4). Although CBS mRNA has not been identified in

mammalian vessels, we have found it in trout vessels (R. Wang, R.A.D. and K.R.O., unpublished observation) suggesting a potential function.

The inhibitors used in our, and essentially all other studies on blood vessels, are somewhat non-specific, e.g. AOA inhibits the malate–aspartate shuttle (Bunger et al., 1980), PPG inhibits L-alanine transaminase (Burnett et al., 1980), BCA interacts with NMDA receptors (Roy et al., 1996) and hydroxylamine is a NO donor in rat aorta (Beranova et al., 2005). Thus it is possible that some of the effects of these inhibitors on hypoxic vasodilation and hypoxic vasoconstriction may not involve H<sub>2</sub>S. While it was beyond the scope of this study to characterize the non-specific effects of these inhibitors on the mechanical properties of blood vessels, several points are worth noting. First, we (Fig. 4) and others (Hosoki et al., 1997; Zhao et al., 2003) have clearly demonstrated that H<sub>2</sub>S synthesis by blood vessels is sensitive to specific enzyme inhibitors. Second, inhibition of hypoxic vasodilation and hypoxic vasoconstriction also appears somewhat dependent on specific enzyme inhibitors, i.e. PPG is a better inhibitor of hypoxic relaxation of the rat aorta than AOA, whereas AOA is more effective than PPG in inhibiting hypoxic vasoconstriction in the bovine pulmonary artery. Third, the direct effects of inhibitors on vessel tension do not necessarily mimic their effect on hypoxic vasodilation and hypoxic vasoconstriction; HA contracts lamprey aortas, but inhibits hypoxic vasoconstriction, and AOA has essentially no effect on U-46619 pre-contracted bovine pulmonary arteries, but also inhibits hypoxic vasoconstriction. The effects of HA on bovine pulmonary arteries, however, could be non-specific through the release of NO (Beranova et al., 2005). To our knowledge, there are no specific inhibitors of H<sub>2</sub>S synthesis and clearly they are needed to resolve this issue.

#### *Addition of H<sub>2</sub>S precursor cysteine affects hypoxic responses*

Cysteine, which is the precursor for H<sub>2</sub>S production, doubled the force of a hypoxic contraction in both lamprey aortas and bovine pulmonary arteries (Fig. 6A,B), suggesting that under these circumstances H<sub>2</sub>S production was also increased. The cysteine effect was not apparent in bovine pulmonary arteries unless they had been exposed to prolonged hypoxia whereas pre-hypoxic exposure was not needed in the lamprey. The difference between lamprey and bovine vessels may be due to the amount of endogenous cysteine stored in the vessel or to differences in metabolism. Incubation with cysteine also changed the hypoxic responses of rat aortas, but it unexpectedly augmented the recovery during re-oxygenation rather than the hypoxic relaxation. It is not clear how this occurred.

#### *H<sub>2</sub>S as a mediator of the hypoxic response*

Collectively, the above experiments indicate that H<sub>2</sub>S participates in vascular responses to hypoxia. We propose that it is the metabolism of H<sub>2</sub>S that serves as the 'O<sub>2</sub> sensor/transducer' in vascular smooth muscle. In this model the concentration of vasoactive H<sub>2</sub>S is regulated by the simple balance between endogenous vascular H<sub>2</sub>S production and its

oxidation by available O<sub>2</sub>. As described below, the stoichiometric relationship between [O<sub>2</sub>] and [H<sub>2</sub>S] in vascular smooth muscle and the primordial precedent for H<sub>2</sub>S production in the cytosol and oxidation in the mitochondria add anecdotal support to our model.

Recent studies have shown that  $P_{O_2}$  in the walls of systemic arterioles in many vascular beds is around 50 mmHg, partly because they supply much of the O<sub>2</sub> to tissues, and partly because the rate of O<sub>2</sub> consumption by the vessel wall is very high, up to 500 times that of resting skeletal muscle (Tsai et al., 2002; Shibata et al., 2005). With an oxygen solubility around 10<sup>-6</sup> mol l<sup>-1</sup>mmHg<sup>-1</sup> (see Shibata et al., 2005), the O<sub>2</sub> concentration in arteriolar smooth muscle would be 5–6×10<sup>-5</sup> mol l<sup>-1</sup>. This is strikingly similar to most reports showing plasma [H<sub>2</sub>S] in rats at around 4–6×10<sup>-5</sup> mol l<sup>-1</sup> (Zhao et al., 2001; Geng et al., 2004; Yan et al., 2004; Yusuf et al., 2005). Unfortunately, intracellular [H<sub>2</sub>S] is unknown. It may equal or exceed plasma [H<sub>2</sub>S], but it may also be lower due to compartmentalization within the cell; it is well known that 10<sup>-6</sup> mol l<sup>-1</sup> H<sub>2</sub>S is toxic to isolated mitochondrial cytochrome *c* oxidase, but not to intact cells (see Dombkowski et al., 2005). Thus if there is excess dissolved O<sub>2</sub> relative to H<sub>2</sub>S, as would be expected in normoxia, continual oxidation, and therefore inactivation, of H<sub>2</sub>S would be expected. However, even moderate hypoxia would lower arteriolar [O<sub>2</sub>], which would then decrease the rate of H<sub>2</sub>S oxidation and allow intracellular [H<sub>2</sub>S] to increase. This scenario is feasible. A 1 min reduction in inspired  $P_{O_2}$  in rats, which is similar to that experienced in humans during sleep apnea, lowers  $P_{O_2}$  in cremaster muscle arterioles to 15.8 mmHg (Johnson et al., 2005). This is essentially half that of plasma [H<sub>2</sub>S]. Furthermore, Doeller et al. observed (Doeller et al., 2005) that intact segments of rat aortas produced significant amounts of H<sub>2</sub>S when the incubation medium [O<sub>2</sub>] was 4 μmol l<sup>-1</sup>, but they could not detect H<sub>2</sub>S production when the medium [O<sub>2</sub>] was raised to 200 μmol l<sup>-1</sup>, i.e. normoxia. We predict that the resultant rise in [H<sub>2</sub>S] due to decreased oxidation during hypoxia will then initiate the appropriate vascular responses. The continual oxidation of H<sub>2</sub>S during normoxia may also contribute to the high O<sub>2</sub> demand of vascular smooth muscle.

Intracellular compartmentalization of H<sub>2</sub>S production and oxidation appears to be a common property of all eucaryotic cells and we propose that smooth muscle cells employ this to regulate [H<sub>2</sub>S]. There is accumulating evidence that mitochondria originated from sulfide (H<sub>2</sub>S)-oxidizing bacteria and the nucleocytoplasm from sulfide-reducing (H<sub>2</sub>S generating) Archaea (Searcy, 2003). Where ancient (and some modern) eucaryotic cells shuttled sulfur to generate ATP, we propose that smooth muscle uses this mechanism to regulate the level of H<sub>2</sub>S-mediated vasoactivity. In fact, H<sub>2</sub>S oxidation has been demonstrated in chicken liver mitochondria (Yong and Searcy, 2001) and H<sub>2</sub>S production has been observed in cells lacking mitochondria such as human erythrocytes (Searcy and Lee, 1998). The observations that H<sub>2</sub>S production is essentially the same in normoxic and hypoxic erythrocytes (Searcy and Lee, 1998), whereas pieces of rat thoracic aorta

produce H<sub>2</sub>S when hypoxic, but consume H<sub>2</sub>S when normoxic (Doeller et al., 2005), are also consistent with our model.

It is also possible that vascular H<sub>2</sub>S production is actively regulated as CBS appears to have a number of O<sub>2</sub>-sensitive regulatory sites (Maclean and Kraus, 2004; Stipanuk, 2004; Banerjee and Zou, 2005). This needs further investigation. Even if the short-term H<sub>2</sub>S response to hypoxia is not enzymatically regulated in vascular smooth muscle, tonic regulation of H<sub>2</sub>S production could contribute to resting (normoxic) tone and bias the pattern and magnitude of the hypoxic response.

#### *Function of multi-phasic H<sub>2</sub>S effects*

The distinct phases of the H<sub>2</sub>S response in respiratory vessels (Table 1) may have specific physiological functions at different  $P_{O_2}$  values. As shown in Fig. 2, low [H<sub>2</sub>S] relaxes bovine pulmonary arteries and higher [H<sub>2</sub>S] contracts them. According to our hypothesis, much of the H<sub>2</sub>S produced by the vascular smooth muscle cells during normoxia will be oxidized and the resultant low [H<sub>2</sub>S] will dilate the vessels and minimize pulmonary vascular resistance. However, during hypoxia, [H<sub>2</sub>S] will increase and result in the characteristic constriction. Although H<sub>2</sub>S levels have not been measured in bovine plasma or in smooth muscle intracellular fluid, [H<sub>2</sub>S] in (putatively normoxic) rat plasma is usually around 4×10<sup>-5</sup> mol l<sup>-1</sup> (Zhao et al., 2001; Geng et al., 2004; Yan et al., 2004; Yusuf et al., 2005). In fact, it has been estimated that vascular H<sub>2</sub>S may approach 10<sup>-4</sup> mol l<sup>-1</sup> in some vessels (Zhao and Wang, 2002), although intracellular [H<sub>2</sub>S] may be somewhat lower due to compartmentalization. As shown in Fig. 2, maximum dilation to H<sub>2</sub>S in bovine pulmonary artery occurs around 10<sup>-5</sup> mol l<sup>-1</sup> H<sub>2</sub>S and this is also the threshold for constriction. A tenfold increase in [H<sub>2</sub>S] to 10<sup>-4</sup> mol l<sup>-1</sup> will shift the vessel from nearly complete relaxation to 40% of a maximal H<sub>2</sub>S contraction.

Distinct dose-dependent dilatory and constrictory effects of H<sub>2</sub>S are not unique to bovine pulmonary arteries; we have also characterized them in rainbow trout efferent branchial (systemic) arteries where they overlap with plasma titers (Dombkowski et al., 2004), and in Pekin duck pulmonary arteries (Dombkowski et al., 2005). This suggests that the  $P_{O_2}$ -H<sub>2</sub>S system is a versatile bipolar effector of vascular responses to ambient O<sub>2</sub> in many vertebrates.

#### *Acute vs chronic hypoxia*

Previous investigators (Zhang et al., 2003; Zhang et al., 2004) have suggested that H<sub>2</sub>S is inversely related to hypoxic pulmonary hypertension. They (Zhang et al., 2003; Zhang et al., 2004) reported that hypoxia decreased H<sub>2</sub>S production in rat pulmonary arteries and they concluded that the resultant loss in H<sub>2</sub>S-mediated vasodilation contributed to the observed increase in pulmonary vascular resistance. While this conclusion appears to contradict ours, it likely represents a fundamentally different mechanism. First, they (Zhang et al., 2003; Zhang et al., 2004) examined the effects of chronic (3 weeks, 6 h per day, 10% O<sub>2</sub>) hypoxia *in vivo*, whereas our study focuses on the immediate



effects of acute hypoxia in isolated vessels. Second, they found that hypoxia produced vascular hypertrophy, but because they did not directly examine the response of pulmonary vessels to H<sub>2</sub>S, they could only assume that it would be a relaxation similar to that observed in the aorta (Zhao et al., 2001; Zhao and Wang, 2002). Our present and prior studies (Dombkowski et al., 2004) show that H<sub>2</sub>S constricts many respiratory vessels. Although it is likely that many of the effects of chronic hypoxia are mediated by genomic factors (as shown by vascular remodeling), it is doubtful that these would contribute to the acute hypoxic responses we observed.

#### Overview

Hypoxic vasoconstriction and dilation have been observed in blood vessels from all classes of vertebrates and although numerous factors, endothelial and otherwise, can modify these responses, it would seem that the basic mechanisms intrinsic to vascular smooth muscle have a conservative evolutionary history. Perhaps this is best exemplified in cyclostomes where the mono-phasic hypoxic vasoconstriction is unencumbered by endothelial and other evolutionary embellishments. H<sub>2</sub>S production and vasoactivity have a similar phylogenetic profile and, based on the present study, H<sub>2</sub>S appears to be interwoven with the hypoxic responses. To date, little is known regarding the mechanism(s) of H<sub>2</sub>S vasoactivity other than its demonstrated ability to open K<sub>ATP</sub> channels and initiate vasodilation. However, H<sub>2</sub>S may prove to be the most versatile gasotransmitter because of its unique ability to participate in redox reactions, form S-nitrosothiols, buffer at physiological pH, and exert biological effects either as a gas or anion. Undoubtedly this versatility is appropriately utilized by vascular smooth muscle.

#### List of abbreviations

|     |                                    |
|-----|------------------------------------|
| AOA | amino-oxyacetate                   |
| BCA | β-cyanoalanine                     |
| bPA | bovine pulmonary artery            |
| CBS | cystathionine β-synthase           |
| CSE | cystathionine (γ-lyase)            |
| HA  | hydroxylamine                      |
| IDA | lamprey dorsal aorta               |
| MST | mercaptopyruvate sulfurtransferase |
| NE  | norepinephrine                     |
| PLP | pyridoxal 5'-phosphate             |
| PPG | D,L-propargylglycine               |
| rA  | rat aorta                          |
| rPA | rat pulmonary artery               |

The authors thank A. Schulman, G. McDowell, A. Simmons and J. Wittig for technical assistance and to Drs R. Brill, J. Hicks, S. Hillman, E. McKee, S. Munns, M. Suckow, B. Swink, and to R. Bell, B. Culver, E. Kisfaludy, D. Meunick and K. Stewart for assistance in obtaining tissues and Dr R. Wang for helpful suggestions and performing the RT-PCR analysis of trout tissues. This work was supported in part by

NSF Grant No. IBN 0235223 and by an Indiana University School of Medicine Research Enhancement Award.

#### References

- Banerjee, R and Zou, C. G.** (2005). Redox regulation and reaction mechanism of human cystathionine-beta-synthase: a PLP-dependent hemesensor protein. *Arch. Biochem. Biophys.* **433**, 144-156.
- Beranova, P., Chalupsky, K., Kleschyov, A. L., Schott, C., Boucher, J. L., Mansuy, D., Munzel, T., Muller, B. and Stoclet, J. C.** (2005). Nomega-hydroxy-L-arginine homologues and hydroxylamine as nitric oxide-dependent vasorelaxant agents. *Eur. J. Pharmacol.* **516**, 260-267.
- Bunger, R., Glanert, S., Sommer, O. and Gerlach, E.** (1980). Inhibition by (aminooxy)acetate of the malate-aspartate cycle in the isolated working guinea pig heart. *Hoppe-Seyler's Z. Physiol. Chem.* **361**, 907-914.
- Burnett, G., Marcotte, P. and Walsh, C.** (1980). Mechanism-based inactivation of pig heart L-alanine transaminase by L-propargylglycine. Half-site reactivity. *J. Biol. Chem.* **255**, 3487-3491.
- Cheng, Y., Ndisang, J. F., Tang, G., Cao, K. and Wang, R.** (2004). Hydrogen sulfide-induced relaxation of resistance mesenteric artery beds of rats. *Am. J. Physiol.* **287**, H2316-H2323.
- Doeller, J. E., Isbell, T. S., Benavides, G., Koenitzer, J., Patel, H., Patel, R. P., Lancaster, J. R., Darley-Usmar, V. M. and Kraus, D. W.** (2005). Polarographic measurement of hydrogen sulfide production and consumption by mammalian tissues. *Anal. Biochem.* **341**, 40-51.
- Dombkowski, R. A.** (2006). Effects of hydrogen sulfide in vertebrate smooth muscle. PhD thesis, University of Notre Dame, Indiana, USA.
- Dombkowski, R. A., Russell, M. J. and Olson, K. R.** (2004). Hydrogen sulfide as an endogenous regulator of vascular smooth muscle tone in trout. *Am. J. Physiol.* **286**, R678-R685.
- Dombkowski, R. A., Russell, M. J., Schulman, A. A., Doellman, M. M. and Olson, K. R.** (2005). Vertebrate phylogeny of hydrogen sulfide vasoactivity. *Am. J. Physiol.* **288**, R243-R252.
- Dombkowski, R. A., Doellman, M. M., Head, S. K. and Olson, K. R.** (2006). Hydrogen sulfide mediates hypoxia-induced relaxation of trout urinary bladder smooth muscle. *J. Exp. Biol.* **209**, 3234-3240.
- Frisbee, J. C., Sylvester, F. A. and Lombard, J. H.** (2001). High-salt diet impairs hypoxia-induced cAMP production and hyperpolarization in rat skeletal muscle arteries. *Am. J. Physiol.* **281**, H1808-H1815.
- Gelband, C. H. and Gelband, H.** (1997). Ca<sup>2+</sup> release from intracellular stores is an initial step in hypoxic pulmonary vasoconstriction of rat pulmonary artery resistance vessels. *Circulation* **96**, 3647-3654.
- Geng, B., Chang, L., Pan, C., Qi, Y., Zhao, J., Pang, Y., Du, J. and Tang, C.** (2004). Endogenous hydrogen sulfide regulation of myocardial injury induced by isoproterenol. *Biochem. Biophys. Res. Commun.* **318** 756-763.
- Hosoki, R., Matsuki, N. and Kimura, H.** (1997). The possible role of hydrogen sulfide as an endogenous smooth muscle relaxant in synergy with nitric oxide. *Biochem. Biophys. Res. Commun.* **237**, 527-531.
- Johnson, P. C., Vandergriff, K., Tsai, A. G. and Intaglietta, M.** (2005). Effect of acute hypoxia on microcirculatory and tissue oxygen levels in rat cremaster muscle. *J. Appl. Physiol.* **98**, 1177-1184.
- Kery, V., Poneleit, L., Meyer, J. D., Manning, M. C. and Kraus, J. P.** (1999). Binding of pyridoxal 5'-phosphate to the heme protein human cystathionine β-synthase. *Biochemistry* **38**, 2716-2724.
- Kimura, H., Nagai, Y., Umemura, K. and Kimura, Y.** (2005). Physiological roles of hydrogen sulfide: synaptic modulation, neuroprotection, and smooth muscle relaxation. *Biochem. Biophys. Res. Commun.* **267**, 129-133.
- Lombard, J. H., Liu, Y., Fredricks, K. T., Bizub, D. M., Roman, R. J. and Rusch, N. J.** (1999). Electrical and mechanical responses of rat middle cerebral arteries to reduced P<sub>O<sub>2</sub></sub> and prostacyclin. *Am. J. Physiol.* **276**, H509-H516.
- Maclean, K. N. and Kraus, J. P.** (2004). Hydrogen sulfide production and metabolism in mammalian tissues. In *Signal Transduction and the Gasotransmitters* (ed. R. Wang), pp. 275-292. Totowa, NJ: Humana Press.
- Olson, K. R.** (2005). Vascular actions of hydrogen sulfide in non-mammalian vertebrates. *Antioxid. Redox Signal.* **7**, 804-812.
- Olson, K. R. and Meisher, K. D.** (1989). Effects of atrial natriuretic factor on isolated arteries and perfused organs of trout. *Am. J. Physiol.* **256**, R10-R18.
- Olson, K. R., Russell, M. J. and Forster, M. E.** (2001). Hypoxic vasoconstriction of cyclostome systemic vessels: the physiological antecedent of hypoxic pulmonary vasoconstriction? *Am. J. Physiol.* **280**, R198-R206.



- Patacchini, R., Santicoli, P., Giuliani, S. and Maggi, C. A.** (2005). Pharmacological investigation of hydrogen sulfide (H<sub>2</sub>S) contractile activity in rat detrusor muscle. *Eur. J. Pharmacol.* **509**, 171-177.
- Pearce, W. J., Ashwal, S. and Cuevas, J.** (1989). Direct effect of graded hypoxia on intact and denuded rabbit cranial arteries. *Am. J. Physiol.* **257**, H824-H833.
- Robertson, T. P., Hague, D., Aaronson, P. I. and Ward, J. P. T.** (2000). Voltage-independent calcium entry in hypoxic pulmonary vasoconstriction of intrapulmonary arteries of the rat. *J. Physiol. Lond.* **525**, 669.
- Roth, S. H.** (2004). Toxicological and environmental impacts of hydrogen sulfide. In *Signal Transduction and the Gasotransmitters* (ed. R. Wang), pp. 293-313. Totowa, NJ: Humana Press.
- Roy, D. N., Sabri, M. I., Kayton, R. J. and Spencer, P. S.** (1996). beta-Cyano-L-alanine toxicity: evidence for the involvement of an excitotoxic mechanism. *Nat. Toxins* **4**, 247-253.
- Russell, M. J., Pelaez, N. J., Packer, C. S., Forster, M. E. and Olson, K. R.** (2001). Intracellular and extracellular calcium utilization during hypoxic vasoconstriction of cyclostome aortas. *Am. J. Physiol.* **281**, R1506-R1513.
- Searcy, D.** (2003). Metabolic integration during the evolutionary origin of mitochondria. *Cell Res.* **13**, 229-238.
- Searcy, D. G. and Lee, S. H.** (1998). Sulfur reduction by human erythrocytes. *J. Exp. Zool.* **282**, 310-322.
- Shibata, M., Ichioka, S. and Kamiya, A.** (2005). Estimating oxygen consumption rates of arteriolar walls under physiological conditions in rat skeletal muscle. *Am. J. Physiol.* **289**, H295-H300.
- Shimizu, S., Bowman, P. S., Thorne, G. and Paul, R. J.** (2000). Effects of hypoxia on isometric force, intracellular Ca<sup>2+</sup>, pH, and energetics in porcine coronary artery. *Circ. Res.* **86**, 862-870.
- Sidhu, R., Sing, M., Samir, G. and Carson, R. J.** (2001). L-cysteine and sodium hydrosulphite inhibit spontaneous contractility of isolated pregnant rat uterine strips *in vitro*. *Pharmacol. Toxicol.* **88**, 198-203.
- Smith, M. P., Russell, M. J., Wincko, J. T. and Olson, K. R.** (2001). Effects of hypoxia on isolated vessels and perfused gills of rainbow trout. *Comp. Biochem. Physiol.* **130A**, 171-181.
- Stipanuk, M. H.** (2004). Sulfur amino acid metabolism: pathways for production and removal of homocysteine and cysteine. *Annu. Rev. Nutr.* **24**, 539-577.
- Teague, B., Asiedu, S. and Moore, P. K.** (2002). The smooth muscle relaxant effect of hydrogen sulphide *in vitro*: evidence for a physiological role to control intestinal contractility. *Br. J. Pharmacol.* **137**, 139-145.
- Thorne, G. D., Conforti, L. and Paul, R. J.** (2002). Hypoxic vasorelaxation inhibition by organ culture correlates with loss of kV channels but not Ca<sup>2+</sup> channels. *Am. J. Physiol.* **283**, H247-H253.
- Tsai, A. G., Johnson, P. C. and Intaglietta, M.** (2002). Oxygen gradients in the microcirculation. *Physiol. Rev.* **83**, 933-963.
- Wang, R.** (2002). Two's company, three's a crowd: can H<sub>2</sub>S be the third endogenous gaseous transmitter? *FASEB J.* **16**, 1792-1798.
- Wang, R., Cheng, Y. and Wu, L.** (2004). The role of hydrogen sulfide as an endogenous vasorelaxant factor. In *Signal Transduction and the Gasotransmitters* (ed. R. Wang), pp. 323-332. Totowa, NJ: Humana Press.
- Yan, H., Do, J. and Tang, C.** (2004). The possible role of hydrogen sulfide on the pathogenesis of spontaneous hypertension in rats. *Biochem. Biophys. Res. Commun.* **313**, 22-27.
- Yong, R. and Searcy, D. G.** (2001). Sulfide oxidation coupled to ATP synthesis in chicken liver mitochondria. *Comp. Biochem. Physiol.* **129B**, 129-137.
- Yusuf, M., Kwong Huat, B. T., Hsu, A., Whiteman, M., Bhatia, M. and Moore, P. K.** (2005). Streptozotocin-induced diabetes in the rat is associated with enhanced tissue hydrogen sulfide biosynthesis. *Biochem. Biophys. Res. Commun.* **333**, 1146-1152.
- Zhang, C., Du, J., Bu, D., Yan, H., Tang, X. and Tang, C.** (2003). The regulatory effect of hydrogen sulfide on hypoxic pulmonary hypertension in rats. *Biochem. Biophys. Res. Commun.* **302**, 810-816.
- Zhang, Q., Du, J., Zhou, W., Yan, H., Tang, C. and Zhang, C.** (2004). Impact of hydrogen sulfide on carbon monoxide/heme oxygenase pathway in the pathogenesis of hypoxic pulmonary hypertension. *Biochem. Biophys. Res. Commun.* **317**, 30-37.
- Zhao, W. and Wang, R.** (2002). H<sub>2</sub>S-induced vasorelaxation and underlying cellular and molecular mechanisms. *Am. J. Physiol.* **283**, H474-H480.
- Zhao, W., Zhang, J., Lu, Y. and Wang, R.** (2001). The vasorelaxant effect of H<sub>2</sub>S as a novel endogenous KATP channel opener. *EMBO J.* **20**, 6008-6016.
- Zhao, W., Ndisang, J. F. and Wang, R.** (2003). Modulation of endogenous production of H<sub>2</sub>S in rat tissues. *Can. J. Physiol. Pharmacol.* **81**, 848-853.
